# Supplementary material
Source: PubMed Central journal article supplement (PMC2875813)
Supplement: en.2009-1013_1.pdf [file en.2009-1013_1.pdf]

Suppl. 1 (XU) SIRT1<sup>+/-</sup> transgenic mice have no hepatic steatosis on low-fat chow diet

### A. Body weight, fat and lean mass

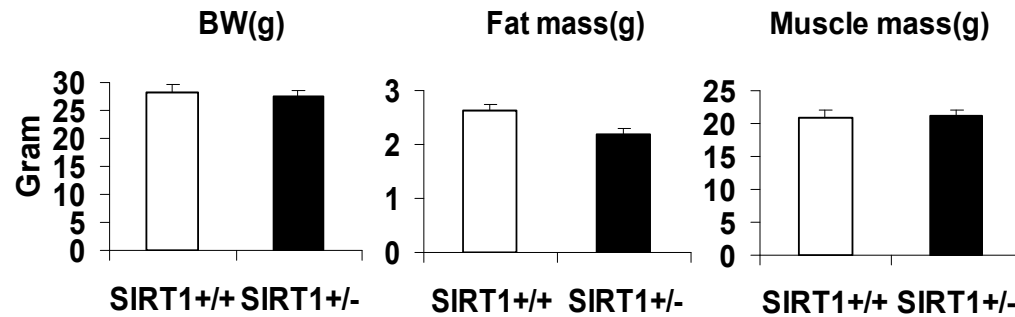

### B. Liver H&E staining

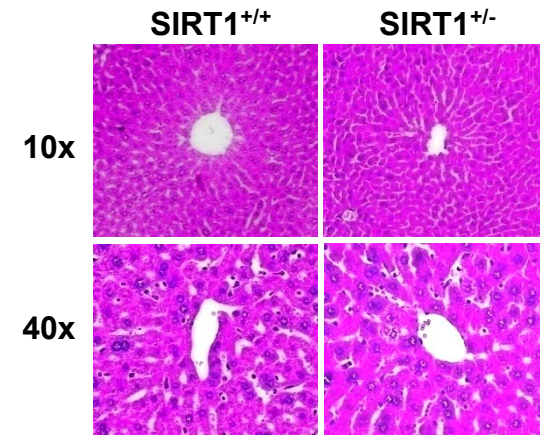

### C. Glucose and lipogenic genes

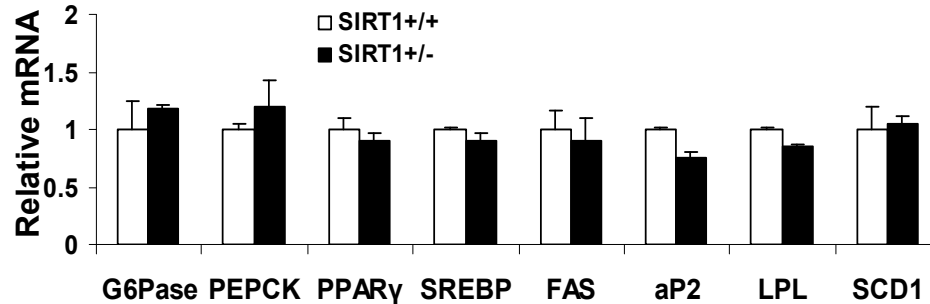

### D. Inflammatory genes

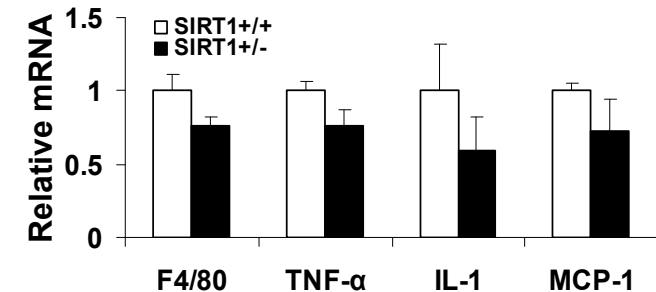

**Suppl. 1 SIRT1<sup>+/-</sup> transgenic mice had no hepatic steatosis on LFD.** **A.** Body weight and body composition at 24 weeks on the low fat diet. **B.** Hematoxylin and eosin staining of liver. Liver was collected at 24 weeks of age on the low fat diet. The tissue was stained in H&E and pictures were taken using a microscopy with 10x or 40x object lenses, respectively. **C.** Expression of gluconeogenic and lipogenic genes in liver. mRNA was determined using qRT-PCR and normalized with 18S ribosome RNA. The fold change in mRNA is presented. **D.** Inflammatory genes. In the bar figures, values are presented as the means  $\pm$  SE (n=7).

Suppl. 2 (XU) Lipid in skeletal muscle, NF- $\kappa$ B activity and ACC expression in liver

**A. Muscle H&E staining**

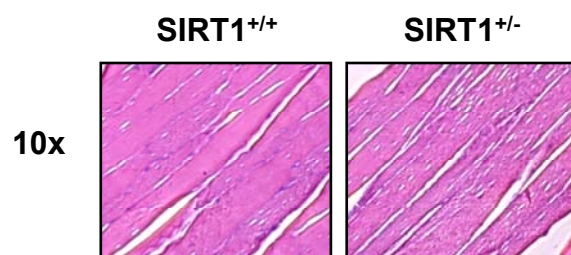

**B. Protein levels in liver**

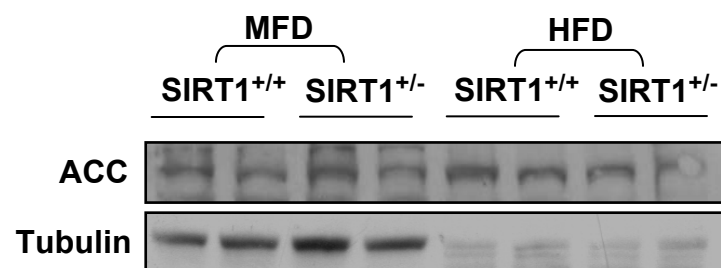

**Suppl. 2 A.** H&E staining in muscle. Gastrocnemius muscle was examined for fat content in mice at 28 weeks of age on MFD. **B.** Protein levels in liver. Liver tissue lysate was made from mice on MFD or HFD. The lysate was examined in a Western blot for the protein signals.

### **Suppl. 3 Primer sequence for qRT-PCR detection of liver genes in VLDL-TG production**

Apob: forward, 5'-GCCCATTGTGGACAAGTTGATC-3', reverse, 5'-CCAGGACTTGGAGGTCTTGGA-3'

Apobec-1: forward, 5'- TCGTCCGAACACCAGATGCT-3', reverse, 5'- GGTGTCGGCTCAGAAACTCTGT-3'

Apoe: forward, 5'- CCTGAACCGCTTCTGGGATT-3', reverse, 5'-GCTCTTCCTGGACCTGGTCA-3'

Dgat-1: forward, 5'-GGTGCCGTGACAGAGCAGAT-3', reverse, 5'-CAGTAAGGCCACAGCTGCTG-3'

Mttp: forward, 5'-CAAGCTCACGTACTCCACTGAAG-3', reverse, 5'-TCATCATCACCATCAGGATTCCT-3'

#### **Reference:**

Wiegman CH, Bandsma RH, Ouwens M, van der Sluijs FH, Havinga R, Boer T, Reijngoud DJ, Romijn JA, Kuipers F. Hepatic VLDL production in ob/ob mice is not stimulated by massive de novo lipogenesis but is less sensitive to the suppressive effects of insulin. *Diabetes* 52(5):1081-9, 2003.
